# Supplementary material for: Association between Asthma and Lower Levels of Physical Activity: Results of a Population-Based Case–Control Study in Spain
Source: MDPI journal article supplement (doi:10.3390/jcm13020591), 2024-01-19
Supplement: s1 [file s1]

**Table S1.** Definition of variables according to the questions included in the European Health Interview Surveys in Spain conducted in the years 2014 and 2020.

| Questions                                                                         | Description and answer                                                                                                                                                                                                                                                                                                                                                                                                                                  | Variables name                     | Categories                                                                                                   |
|-----------------------------------------------------------------------------------|---------------------------------------------------------------------------------------------------------------------------------------------------------------------------------------------------------------------------------------------------------------------------------------------------------------------------------------------------------------------------------------------------------------------------------------------------------|------------------------------------|--------------------------------------------------------------------------------------------------------------|
| Have you been diagnosed with asthma by a physician?                               | 1.Yes<br>2.No                                                                                                                                                                                                                                                                                                                                                                                                                                           | Asthma                             | 1. Case<br>2. Control                                                                                        |
| What type of physical activity do you engage in during your free time?            | 1. I do not exercise. My leisure time is primarily sedentary.<br>2. I engage in occasional physical or sports activities (e.g., walking, cycling, gardening, light gymnastics, recreational activities requiring minimal effort, etc.).<br>3. I participate in physical activities several times a month (e.g., sports, gymnastics, running, swimming, cycling, team games, etc.).<br>4. I undergo athletic or physical training multiple times a week. | Leisure time physical activity     | 1 . None Option 1<br>2. Occasional or frequent Options 2, 3 and 4                                            |
| In a typical week, how many days do you walk for at least 10 consecutive minutes? | Number of days (0 to 7)                                                                                                                                                                                                                                                                                                                                                                                                                                 | Number of days of walking per week | 1. None or one day<br>2. Two or more days                                                                    |
| Which is your sex?                                                                | 1. Man<br>2. Women                                                                                                                                                                                                                                                                                                                                                                                                                                      | Sex                                | 1. Man<br>2. Women                                                                                           |
| How old are you?                                                                  | Age in years                                                                                                                                                                                                                                                                                                                                                                                                                                            | Age groups                         | 1. 18-49<br>2. 50-69<br>3. ≥70                                                                               |
| What level of education have you completed?                                       | 1. Does not know how to read or write<br>2. Incomplete primary education<br>3. Complete primary education<br>4. First stage of Secondary Education, with or without a qualification<br>5. Elementary Spanish Upper Secondary Education                                                                                                                                                                                                                  | Educational level                  | 1. No studies/Primary: Options 1 to 3<br>2. Secondary: Options 4 to 8<br>3. High education: Options 9 and 10 |

|                              |                                                   |                       |                               |
|------------------------------|---------------------------------------------------|-----------------------|-------------------------------|
|                              | 6. Upper secondary education                      |                       |                               |
|                              | 7. Intermediate vocational training or equivalent |                       |                               |
|                              | 8. Advanced vocational training or equivalent     |                       |                               |
|                              | 9. University studies or equivalent               |                       |                               |
|                              | 10. Over university (master, PhD....)             |                       |                               |
| What is your marital status? | 1. Single                                         | Living with a partner | 1. Yes: Option 2              |
|                              | 2. Married                                        |                       | 2. Nor: options 1, 3, 4 and 5 |
|                              | 3. Widower                                        |                       |                               |
|                              | 4. Separated                                      |                       |                               |
|                              | 5. Divorced                                       |                       |                               |

**Table S1.** Definition of variables according to the questions included in the European Health Interview Surveys in Spain conducted in the years 2014 and 2020. (Continued.)

| Questions                                                                                      | Description and answer                                      | Variables           | Categories                                                                   |
|------------------------------------------------------------------------------------------------|-------------------------------------------------------------|---------------------|------------------------------------------------------------------------------|
| In the past twelve month, how is your perception of your general health status?                | 1. Very good<br>2. Good<br>3. Fair<br>4. Bad<br>5. Very bad | Self-rated health   | 1. Very good/good: Options 1 and 2<br>2. Fair/poor/very poor: Options 3 to 5 |
| Have you been diagnosed with diabetes by a physician?                                          | 1.Yes<br>2.No                                               | Diabetes            | 1. Yes<br>2. No                                                              |
| Have you been diagnosed with heart diseases (heart failure or coronary disease by a physician? | 1.Yes<br>2.No                                               | Heart diseases      | 1. Yes<br>2. No                                                              |
| Have you been diagnosed with stroke by a physician?                                            | 1.Yes<br>2.No                                               | Stroke              | 1. Yes<br>2. No                                                              |
| Have you been diagnosed with cancer by a physician?                                            | 1.Yes<br>2.No                                               | Cancer              | 1. Yes<br>2. No                                                              |
| Have you been diagnosed with COPD by a physician?                                              | 1.Yes<br>2.No                                               | COPD                | 1. Yes<br>2. No                                                              |
| Have you been diagnosed with high blood pressure by a physician?                               | 1.Yes<br>2.No                                               | High blood pressure | 1. Yes<br>2. No                                                              |

|                                                                                                                                                                         |                                                                                                                                                                                                                                                                                                |                     |                                                   |
|-------------------------------------------------------------------------------------------------------------------------------------------------------------------------|------------------------------------------------------------------------------------------------------------------------------------------------------------------------------------------------------------------------------------------------------------------------------------------------|---------------------|---------------------------------------------------|
| Have you been diagnosed with anxiety or depression by a physician?                                                                                                      | 1.Yes<br>2.No                                                                                                                                                                                                                                                                                  | Mental disease      | 1. Yes<br>2. No                                   |
| During the past 12 months, how often have you had alcoholic beverages of any kind (i.e. beer, wine, spirits, distilled and mixed drinks, or other alcoholic beverages)? | 1. Daily or almost daily<br>2. 5-6 days per week<br>3. 3-4 days per week<br>4. 1-2 days per week<br>5. 2-3 days in a month<br>6. Once a month<br>7. Less than once a month<br>8. Not in the last 12 months, have I stopped drinking<br>9. Never or just a few sips to taste it throughout life | Alcohol consumption | 1. Yes: Options 1 to 6<br>2. No: Option 7 to 9    |
| Could you tell me if you smoke?                                                                                                                                         | 1. Yes, I smoke daily<br>2. Yes, I smoke, but not daily<br>3. I don't currently smoke but have smoked before<br>4. I neither smoke nor have I ever smoked regularly                                                                                                                            | Active smoking      | 1. Yes: Options 1 and 2<br>2. No: Options 3 and 4 |
| 1. Could you tell me how tall you are, approximately, without shoes?<br>2. Could you tell me your weight, approximately, without shoes and clothes?                     | Body mass index is calculated with the formulae:<br>Weight in kg/ (Height in meters) <sup>2</sup>                                                                                                                                                                                              | Body mass index     | 1. <25<br>2, 25-29.9<br>3. ≥30                    |

COPD: chronic obstructive pulmonary disease.

**Table S2.** Variables associated with occasional or frequent leisure time physical activity and number of walking days per week  $\geq 2$  among participants in the European Health Interview Surveys in Spain conducted in the years 2014 and 2020. Results of multivariable logistic regression analysis.

|                   |                    | Occasional or frequent LTPA | Number of walking days per week $\geq 2$ |
|-------------------|--------------------|-----------------------------|------------------------------------------|
|                   |                    | OR (95% CI)                 | OR (95% CI)                              |
| Gender            | Women              | 1                           | 1                                        |
|                   | Men                | 1.54(1.35-1.75)             | 1.13(0.97-1.32)                          |
| Age groups        | $\geq 75$ years    | 1                           | 1                                        |
|                   | 50-69 years        | 1.91(1.60-2.28)             | 2.70(2.22-3.29)                          |
|                   | 18-49 years        | 1.81(1.50-2.17)             | 2.61(2.12-3.21)                          |
| Educational level | No studies/primary | 1                           | 1                                        |
|                   | Secondary          | 1.32(1.11-1.57)             | 1.35(1.08-1.69)                          |
|                   | High education     | 1.79(1.52-2.10)             | 1.35(1.10-1.65)                          |
| Heart diseases    | No                 | -                           | 1                                        |
|                   | Yes                | 0.67(0.55-0.82)             | NIFM                                     |
| Stroke            | No                 | 1                           | 1                                        |
|                   | Yes                | 0.65(0.44-0.98)             | NIFM                                     |
| Mental disorder   | No                 | 1                           | 1                                        |
|                   | Yes                | 0.70(0.60-0.83)             | NIFM                                     |
| Diabetes          | No                 | 1                           | 1                                        |
|                   | Yes                | 0.78(0.63-0.96)             | 0.80(0.62-0.97)                          |
| Active smoking    | No                 | 1                           | -                                        |
|                   | Yes                | 0.60(0.51-0.70)             | 0.79(0.65-0.95)                          |
| Body mass index   | $\geq 30$          | 1                           | 1                                        |
|                   | 25-29.9            | 1.64(1.39-1.94)             | 1.50(1.24-1.82)                          |
|                   | $< 25$             | 1.77(1.39-1.94)             | 1.41(1.16-1.71)                          |
| Year              | 2014               | 1                           | 1                                        |
|                   | 2020               | 0.95(0.84-1.08)             | 1.86(1.60-2.16)                          |
| Asthma            | No                 | 1                           | 1                                        |
|                   | Yes                | 0.87(0.47-0.72)             | 0.84 (0.72-0.97)                         |

LTPA: leisure time physical activity; OR: odds ratios; CI: confidence interval; NIFM: not included in final the model.
